# Supplementary material for: Interactomic analysis of REST/NRSF and implications of its functional links with the transcription suppressor TRIM28 during neuronal differentiation
Source: PubMed Central journal article supplement (PMC5157023; doi:10.1038/srep39049), 2016-12-15
Supplement: srep39049-s1.pdf [file srep39049-s1.pdf]

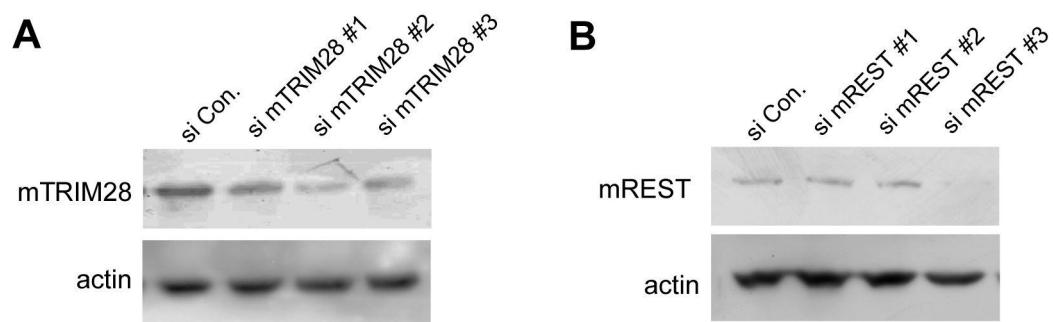

Sup. Fig. 1

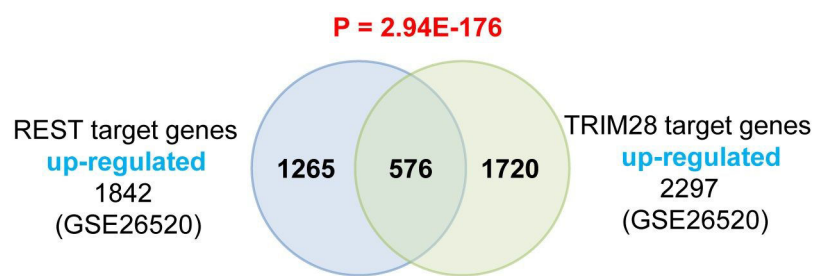

Sup. Fig. 2

Fig. 1A

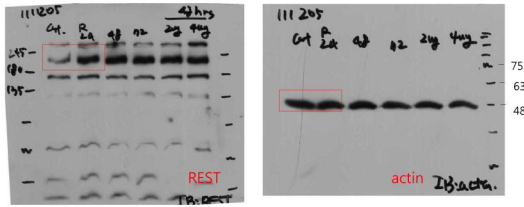

Fig. 1D

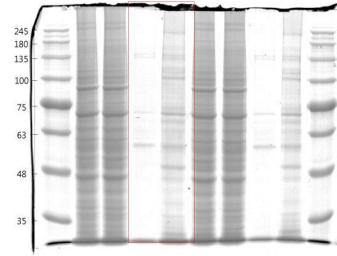

Fig. 3A

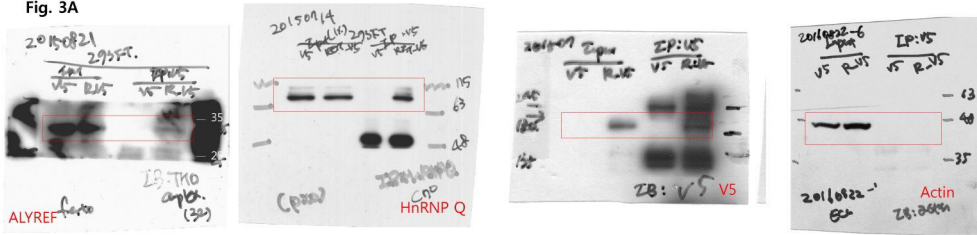

Fig. 3B

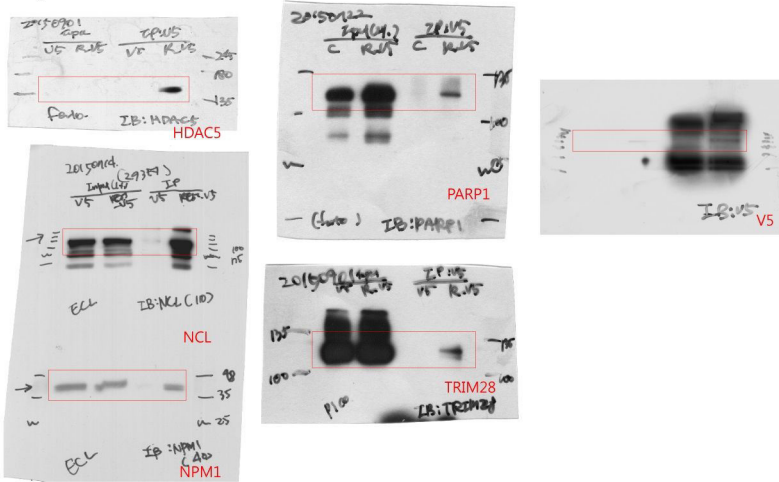

Fig. 6D

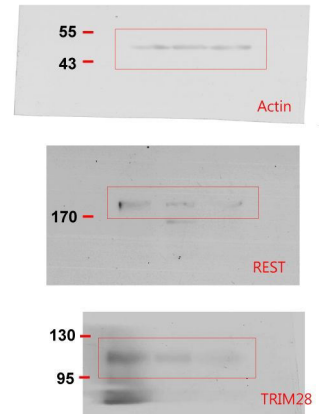

Fig. 5A

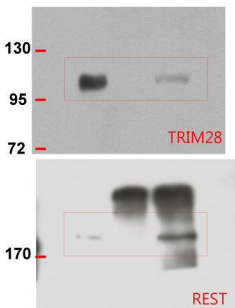

Fig. 5B

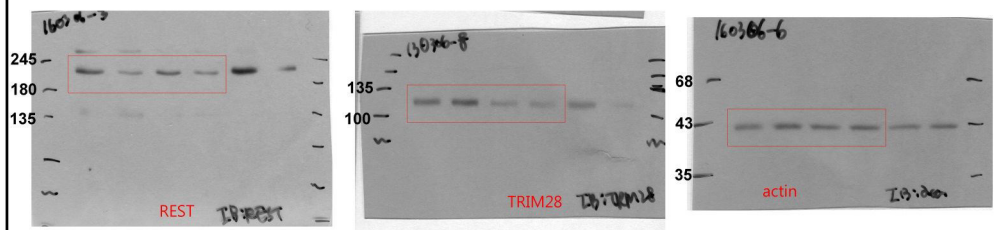

Sup. Fig. 3

Interactomic analysis of REST/NRSF and implications of its functional links with the transcription suppressor TRIM28 during neuronal differentiation

; Namgyu Lee, Sung Jin Park, Dae-Kyum Kim, Ghazal Haddad, Seon-Min Park, Sang Ki Park, Kwan Yong Choi

**Supplementary Table 5. List of REST-interacting proteins identified previously**

| <b>Interacting proteins</b>                                                 | <b>Experiment</b>                     | <b>Reference</b> |
|-----------------------------------------------------------------------------|---------------------------------------|------------------|
| mSin3                                                                       | pull down                             | [1]              |
| Sin3A                                                                       | co-IP                                 | [2]              |
| CoREST                                                                      | pull down, yeast two-hybrid screening | [3]              |
| G9a                                                                         | co-IP                                 | [4]              |
| CtBP                                                                        | co-IP                                 | [5]              |
| BRG1 (SMARCA4)                                                              | co-IP                                 | [6]              |
| HDAC1                                                                       | co-IP                                 | [2]              |
| HDAC2                                                                       | co-IP                                 | [7]              |
| HDAC4                                                                       | co-IP                                 | [8]              |
| <b>HDAC5</b>                                                                | co-IP                                 | [8]              |
| MeCP2                                                                       | ChIP                                  | [9]              |
| Zfp90                                                                       | yeast two hybridization, co-IP        | [10]             |
| PC4                                                                         | co-IP, pull down                      | [11]             |
| SWI/SNF complex; BRG1, Brm, BAF155                                          | Co-IP                                 | [12]             |
| RILP                                                                        | yeast two hybridization, co-IP        | [13]             |
| Kaposin A (KSHV latency, in cytoplasm)                                      | co-IP                                 | [14]             |
| Huntingtin                                                                  | co-IP                                 | [15]             |
| $\beta$ -TRCP                                                               | pull down                             | [16]             |
| HAUSP                                                                       | co-IP, immunocytochemistry            | [17]             |
| TBP                                                                         | co-IP                                 | [18]             |
| Polycomb Repressor Complex 1 (PRC1) and PRC2; Suz12, Ezh2, Eed, Rnf2, Nspc1 | co-IP                                 | [19]             |
| TSPYL2                                                                      | Mass spectrometry, Co-IP              | [20]             |
| TRF2                                                                        | co-IP, immunocytochemistry            | [21]             |

\* Bold is detected in our interactome.

## References

1. Nomura M, Uda-Tochio H, Murai K, Mori N and Nishimura Y. The neural repressor NRSF/REST binds the PAH1 domain of the Sin3 corepressor by using its distinct short hydrophobic helix. *J Mol Biol.* 2005; 354(4):903-915.
2. Huang Y, Myers SJ and Dingledine R. Transcriptional repression by REST: recruitment of Sin3A and histone deacetylase to neuronal genes. *Nat Neurosci.* 1999; 2(10):867-872.
3. Andres ME, Burger C, Peral-Rubio MJ, Battaglioli E, Anderson ME, Grimes J, Dallman J, Ballas N and Mandel G. CoREST: a functional corepressor required for regulation of neural-specific gene expression. *Proceedings of the National Academy of Sciences of the United States of America.* 1999; 96(17):9873-9878.
4. Roopra A, Qazi R, Schoenike B, Daley TJ and Morrison JF. Localized domains of G9a-mediated histone methylation are required for silencing of neuronal genes. *Molecular cell.* 2004; 14(6):727-738.
5. Garriga-Canut M, Schoenike B, Qazi R, Bergendahl K, Daley TJ, Pfender RM, Morrison JF, Ockuly J, Stafstrom C, Sutula T and Roopra A. 2-Deoxy-D-glucose reduces epilepsy progression by NRSF-CtBP-dependent metabolic regulation of chromatin structure. *Nat Neurosci.* 2006; 9(11):1382-1387.
6. Ooi L, Belyaev ND, Miyake K, Wood IC and Buckley NJ. BRG1 chromatin remodeling activity is required for efficient chromatin binding by repressor element 1-silencing transcription factor (REST) and facilitates REST-mediated repression. *The Journal of biological chemistry.* 2006; 281(51):38974-38980.
7. Roopra A, Sharling L, Wood IC, Briggs T, Bachfischer U, Paquette AJ and Buckley NJ. Transcriptional repression by neuron-restrictive silencer factor is mediated via the Sin3-histone deacetylase complex. *Molecular and cellular biology.* 2000; 20(6):2147-2157.
8. Nakagawa Y, Kuwahara K, Harada M, Takahashi N, Yasuno S, Adachi Y, Kawakami R, Nakanishi M, Tanimoto K, Usami S, Kinoshita H, Saito Y and Nakao K. Class II HDACs mediate CaMK-dependent signaling to NRSF in ventricular myocytes. *J Mol Cell Cardiol.* 2006; 41(6):1010-1022.
9. Ching GY and Liem RK. RE1 silencing transcription factor is involved in regulating neuron-specific expression of alpha-internexin and neurofilament genes. *Journal of neurochemistry.* 2009; 109(6):1610-1623.
10. Hata L, Murakami M, Kuwahara K, Nakagawa Y, Kinoshita H, Usami S, Yasuno S, Fujiwara M, Kuwabara Y, Minami T, Yamada Y, Yamada C, Nakao K, Ueshima K, Nishikimi T and Nakao K. Zinc-finger protein 90 negatively regulates neuron-restrictive silencer factor-mediated transcriptional repression of fetal cardiac genes. *J Mol Cell Cardiol.* 2011; 50(6):972-981.
11. Das C, Gadad SS and Kundu TK. Human positive coactivator 4 controls heterochromatinization and silencing of neural gene expression by interacting with REST/NRSF and CoREST. *J Mol Biol.* 2010; 397(1):1-12.
12. Watanabe H, Mizutani T, Haraguchi T, Yamamichi N, Minoguchi S, Yamamichi-Nishina M, Mori N, Kameda T, Sugiyama T and Iba H. SWI/SNF complex is essential for NRSF-mediated suppression of neuronal genes in human nonsmall cell lung carcinoma cell lines. *Oncogene.* 2006; 25(3):470-479.
13. Shimojo M and Hersh LB. REST/NRSF-interacting LIM domain protein, a putative nuclear translocation receptor. *Molecular and cellular biology.* 2003; 23(24):9025-9031.
14. Valiya Veetil M, Dutta D, Bottero V, Bandyopadhyay C, Gjyshi O, Sharma-Walia N, Dutta S and Chandran B. Glutamate secretion and metabotropic glutamate receptor 1

expression during Kaposi's sarcoma-associated herpesvirus infection promotes cell proliferation. *PLoS Pathog.* 2014; 10(10):e1004389.

15. Zuccato C, Tartari M, Crotti A, Goffredo D, Valenza M, Conti L, Cataudella T, Leavitt BR, Hayden MR, Timmusk T, Rigamonti D and Cattaneo E. Huntingtin interacts with REST/NRSF to modulate the transcription of NRSE-controlled neuronal genes. *Nat Genet.* 2003; 35(1):76-83.

16. Westbrook TF, Hu G, Ang XL, Mulligan P, Pavlova NN, Liang A, Leng Y, Maehr R, Shi Y, Harper JW and Elledge SJ. SCFbeta-TRCP controls oncogenic transformation and neural differentiation through REST degradation. *Nature.* 2008; 452(7185):370-374.

17. Huang Z, Wu Q, Guryanova OA, Cheng L, Shou W, Rich JN and Bao S. Deubiquitylase HAUSP stabilizes REST and promotes maintenance of neural progenitor cells. *Nature cell biology.* 2011; 13(2):142-152.

18. Murai K, Naruse Y, Shaul Y, Agata Y and Mori N. Direct interaction of NRSF with TBP: chromatin reorganization and core promoter repression for neuron-specific gene transcription. *Nucleic acids research.* 2004; 32(10):3180-3189.

19. Dietrich N, Lerdrup M, Landt E, Agrawal-Singh S, Bak M, Tommerup N, Rappsilber J, Sodersten E and Hansen K. REST-mediated recruitment of polycomb repressor complexes in mammalian cells. *PLoS Genet.* 2012; 8(3):e1002494.

20. Epping MT, Lunardi A, Nachmani D, Castillo-Martin M, Thin TH, Cordon-Cardo C and Pandolfi PP. TSPYL2 is an essential component of the REST/NRSF transcriptional complex for TGFbeta signaling activation. *Cell Death Differ.* 2015; 22(8):1353-1362.

21. Zhang P, Pazin MJ, Schwartz CM, Becker KG, Wersto RP, Dilley CM and Mattson MP. Nontelomeric TRF2-REST interaction modulates neuronal gene silencing and fate of tumor and stem cells. *Curr Biol.* 2008; 18(19):1489-1494.

**Interactomic analysis of REST/NRSF and implications of its functional links with the transcription suppressor TRIM28 during neuronal differentiation**

; Namgyu Lee, Sung Jin Park, Dae-Kyum Kim, Ghazal Haddad, Seon-Min Park, Sang Ki Park, Kwan Yong

Choi

**Supplementary Table 6. siRNA sequences targeting REST and TRIM28**

|                                      |                                      |
|--------------------------------------|--------------------------------------|
| siGENOME SMART pool,<br>Human REST   | D-006466-06,<br>CGACAUGUAUGACUUGCAU  |
|                                      | D-006466-07,<br>GGGCCUAAACCUCUAAAUU  |
|                                      | D-006466-08,<br>GAUGGAGGGUGCCCAGAU A |
|                                      | D-006466-09,<br>CAGUAUAGUUUGUGAAAUG  |
| siGENOME SMART pool, Human<br>TRIM28 | J-005046-07,<br>GAAAUGUGAGCGUGUACUG  |
|                                      | J-005046-08,<br>GCGAUCUGGUUAUGUGCAA  |
|                                      | J-005046-09,<br>AGACAGCACUGGCGUGGUG  |
|                                      | J-005046-10,<br>GAACGAGGCCUUCGGUGAC  |
| siGENOME SMART pool, Mouse<br>REST   | siRNA#1<br>GUGAUCAGUGCAAUUAUGU       |
|                                      | siRNA#2<br>GAGAACGAGCGCAUCUACA       |
|                                      | siRNA#3<br>CAGAUAGAAGCAACUUCAA       |
| siGENOME SMART pool, Mouse<br>TRIM28 | siRNA#1<br>CUCACAAGGACCAUCAGUA       |
|                                      | siRNA#2<br>CCACCAGUCUUCAAGGUCU       |
|                                      | siRNA#3<br>CAGCAUUGCUACUCUGGAU       |

**Supplementary Table 7. Real-time quantitative PCR primers for human genes**

| Genes  | Sequences                 |
|--------|---------------------------|
| CTNND2 | F CCGTGTTTCCTCATCTATGG    |
|        | R CTGCTGAATGCCTTGTTTAGT   |
| GAPDH  | F CCTGGTATGACAACGAATTTGGC |
|        | R GTACATGACAAGGTGCGGCTC   |



**Supplementary Table 8. Real-time quantitative PCR primers for mouse genes.**

| <b>Genes</b> | <b>Sequences</b> |                        |
|--------------|------------------|------------------------|
| CTNND2       | F                | GAAGTTGGTCGGCATCTCTA   |
|              | R                | TTTGTCGATCCCTCTCGATG   |
| REST         | F                | ATGGAAGTGACCTGAGTGAC   |
|              | R                | GCGATTGAGGTGTTTGCTAT   |
| TRIM28       | F                | GGAAATGTGAGCGTGTTCTC   |
|              | R                | TGAACTGTTTGAACATGCGG   |
| GAPDH        | F                | ACCTGCCAAGTATGATGACA   |
|              | R                | GCCGTATTCATTGTCATACCAG |
